# Supplementary material for: Colorectal Advanced Neoplasms Occur through Dual Carcinogenesis Pathways in Individuals with Coexisting Serrated Polyps
Source: PLoS One. 2014 May 21;9(5):e98059. doi: 10.1371/journal.pone.0098059 (PMC4029807; doi:10.1371/journal.pone.0098059)
Supplement: Information S2 — Clinicopathological and mutation data for serrated polyps. (XLSX) [file pone.0098059.s002.xlsx]

## Sheet: Supporting Information S2.
Supporting Information S2. Clinicopathological and mutation data for serrated polyps
SP#	Patient#	Tissue availability	Age	Gender	Location	Size	Morphology	Pathological diagnosis	Means of Tissue obtaining	BRAF	KRAS
1	S1	No	35	Male	Left	3	0-Is	Serrated lesion	Biopsy	ND	ND
2	S1	No	36	Male	Right	7	0-Is	Hyperplastic polyp	Biopsy	ND	ND
3	S1	Yes	37	Male	Right	4	0-IIa	Hyperplastic polyp	Endoscopic resection	Mutation	Wild-type
4	S1	Yes	38	Male	Right	8	0-Is	Sessile serrated polyp/adenoma	Endoscopic resection	Mutation	Wild-type
5	S1	Yes	38	Male	Right	4	0-IIa	Sessile serrated polyp/adenoma	Endoscopic resection	Wild-type	Wild-type
6	S2	No	64	Male	Right	8	0-Isp	Serrated lesion	Biopsy	ND	ND
7	S2	No	64	Male	Left	4	0-Is	Hyperplastic polyp	Biopsy	ND	ND
8	S2	No	64	Male	Left	4	0-Is	Serrated lesion	Biopsy	ND	ND
9	S2	No	64	Male	Left	4	0-Is	Serrated lesion	Biopsy	ND	ND
10	S3	No	82	Female	Right	8	0-IIa	Serrated lesion	Biopsy	ND	ND
11	S3	No	83	Female	Right	15	0-IIa	Sessile serrated polyp/adenoma	Biopsy	ND	ND
12	S3	No	86	Female	Left	8	0-IIa	Sessile serrated polyp/adenoma	Endoscopic resection	ND	ND
13	S3	No	86	Female	Left	6	0-IIa	Sessile serrated polyp/adenoma	Endoscopic resection	ND	ND
14	S4	Yes	69	Female	Left	4	0-Is	Hyperplastic polyp	Operation	Wild-type	Wild-type
15	S5	No	75	Male	Left	3	0-Is	Serrated lesion	Biopsy	ND	ND
16	S5	No	75	Male	Left	3	0-Is	Serrated lesion	Biopsy	ND	ND
17	S6	No	65	Male	Left	1	0-Is	Hyperplastic polyp	Biopsy	ND	ND
18	S7	Yes	75	Female	Left	10	0-Isp	Hyperplastic polyp	Operation	Wild-type	Mutation
19	S7	Yes	75	Female	Left	20	0-Ip	Traditional serrated adenoma	Operation	Mutation	Wild-type
20	S8	Yes	65	Male	Right	10	0-Is	Hyperplastic polyp	Endoscopic resection	Mutation	Wild-type
21	S8	No	68	Male	Left	3	0-Is	Sessile serrated polyp/adenoma	Biopsy	ND	ND
22	S9	No	65	Male	Right	5	0-IIa	Serrated lesion	Biopsy	ND	ND
23	S10	No	74	Female	Right	4	0-Is	Hyperplastic polyp	Biopsy	ND	ND
24	S11	Yes	79	Male	Left	5	0-Is	Hyperplastic polyp	Operation	Wild-type	Wild-type
25	S12	No	86	Male	Left	3	0-IIa	Hyperplastic polyp	Biopsy	ND	ND
26	S12	No	86	Male	Right	8	0-IIa	Sessile serrated polyp/adenoma	Operation	ND	ND
27	S13	Yes	72	Male	Left	8	0-IIa	Hyperplastic polyp	Operation	Wild-type	Wild-type
28	S14	Yes	87	Male	Left	20	0-Ip	Traditional serrated adenoma	Operation	Mutation	Wild-type
29	S14	Yes	87	Male	Left	5	0-Is	Sessile serrated polyp/adenoma	Operation	Mutation	Wild-type
30	S14	Yes	87	Male	Left	10	0-Isp	Sessile serrated polyp/adenoma	Operation	Mutation	Wild-type
31	S14	No	89	Male	Left	5	0-Isp	Traditional serrated adenoma	Operation	ND	ND
32	S14	Yes	89	Male	Left	15	0-Ip	Traditional serrated adenoma	Operation	Mutation	Wild-type
33	S14	No	89	Male	Left	5	0-Ip	Traditional serrated adenoma	Endoscopic resection	ND	ND
34	S15	No	82	Male	Right	8	0-IIa	Hyperplastic polyp	Biopsy	ND	ND
35	S16	No	76	Male	Left	8	0-Isp	Serrated lesion	Biopsy	ND	ND
36	S17	No	85	Female	Right	3	0-Is	Sessile serrated polyp/adenoma	Biopsy	ND	ND
37	S18	No	58	Male	Right	10	0-IIa	Hyperplastic polyp	Biopsy	ND	ND
38	S19	No	65	Male	Left	5	0-IIa	Sessile serrated polyp/adenoma	Biopsy	ND	ND
39	S19	No	67	Male	Left	3	0-IIa	Hyperplastic polyp	Biopsy	ND	ND
40	S20	No	60	Female	Left	3	0-Is	Hyperplastic polyp	Operation	ND	ND
41	S20	No	62	Female	Left	4	0-Is	Hyperplastic polyp	Biopsy	ND	ND
42	S21	Yes	81	Female	Right	12	0-IIa	Traditional serrated adenoma	Operation	Mutation	Wild-type
43	S22	Yes	78	Male	Left	5	0-Ip	Serrated lesion	Operation	Wild-type	Mutation
44	S22	Yes	78	Male	Left	3	0-Ip	Traditional serrated adenoma	Operation	Wild-type	Wild-type
45	S23	Yes	60	Female	Left	5	0-Is	Hyperplastic polyp	Operation	Mutation	Wild-type
46	S23	Yes	60	Female	Left	5	0-IIa	Hyperplastic polyp	Operation	Wild-type	Wild-type
47	S23	Yes	60	Female	Left	4	0-Is	Serrated lesion	Operation	Mutation	Wild-type
48	S23	Yes	60	Female	Left	7	0-Is	Sessile serrated polyp/adenoma	Endoscopic resection	Mutation	Wild-type
49	S23	No	60	Female	Left	3	0-Is	Hyperplastic polyp	Endoscopic resection	ND	ND
50	S24	No	85	Male	Left	7	0-Isp	Serrated lesion	Biopsy	ND	ND
51	S24	Yes	85	Male	Left	4	0-Is	Hyperplastic polyp	Operation	Wild-type	Wild-type
52	S25	Yes	56	Male	Left	7	0-Is	Hyperplastic polyp	Operation	Wild-type	Wild-type
53	S26	No	65	Male	Left	4	0-Is	Hyperplastic polyp	Biopsy	ND	ND
54	S27	No	59	Male	Left	3	0-Is	Hyperplastic polyp	Biopsy	ND	ND
55	S28	Yes	82	Male	Right	20	0-Is	Sessile serrated polyp/adenoma	Operation	Mutation	Wild-type
56	S29	Yes	69	Male	Left	5	0-Is	Hyperplastic polyp	Operation	Wild-type	Wild-type
57	S30	Yes	66	Female	Left	3	0-Is	Hyperplastic polyp	Operation	Wild-type	Wild-type
58	S31	No	82	Male	Left	10	0-IIa	Hyperplastic polyp	Biopsy	ND	ND
59	S31	No	84	Male	Left	3	0-Isp	Hyperplastic polyp	Operation	ND	ND
60	S32	Yes	61	Male	Left	3	0-Is	Hyperplastic polyp	Operation	Wild-type	Wild-type
61	S33	No	61	Male	Left	4	0-Isp	Traditional serrated adenoma	Biopsy	ND	ND
62	S34	Yes	78	Female	Left	8	0-Is	Hyperplastic polyp	Operation	Wild-type	Wild-type
63	S34	Yes	78	Female	Left	15	0-Is	Sessile serrated polyp/adenoma	Operation	Wild-type	Mutation
64	S35	No	45	Male	Right	6	0-IIa	Hyperplastic polyp	Biopsy	ND	ND
65	S36	Yes	85	Male	Left	5	0-Is	Sessile serrated polyp/adenoma	Operation	Mutation	Wild-type
66	S36	Yes	85	Male	Left	6	0-Is	Hyperplastic polyp	Operation	Mutation	Wild-type
67	S37	Yes	63	Male	Left	10	0-Is	Sessile serrated polyp/adenoma	Operation	Wild-type	Mutation
68	S38	Yes	74	Male	Right	10	0-IIa	Hyperplastic polyp	Endoscopic resection	Wild-type	Wild-type
69	S38	Yes	74	Male	Right	10	0-IIa	Sessile serrated polyp/adenoma	Endoscopic resection	Mutation	Wild-type
70	S39	Yes	76	Male	Left	10	0-Ip	Traditional serrated adenoma	Endoscopic resection	Mutation	Wild-type
71	S40	Yes	79	Male	Left	8	0-Is	Hyperplastic polyp	Endoscopic resection	Wild-type	Wild-type
72	S13	Yes	72	Male	Left	3	0-IIa	Hyperplastic polyp	Operation	Wild-type	Mutation
73	S22	Yes	78	Male	Left	5	0-Ip	Serrated lesion	Operation	Mutation	Wild-type
74	S36	Yes	85	Male	Left	5	0-Is	Hyperplastic polyp	Operation	Wild-type	Wild-type
75	S14	Yes	89	Male	Left	5	0-Is	Serrated lesion	Operation	Mutation	Wild-type
